# Supplementary material for: Isolation of Antidiabetic Principle from Fruit Rinds ofPunica granatum
Source: Hindawi journal article supplement (doi:10.1155/2012/147202), 2012-01-01
Supplement: f1 [file 147202.f1.pdf]

FRUIT RINDS OF *PUNICA GRANATUM*

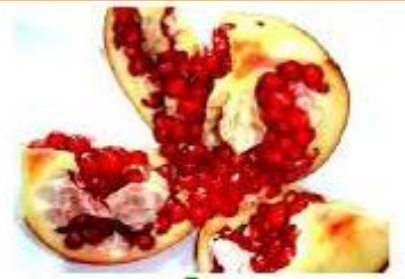

METHANOLIC EXTRACT FROM FRUIT RINDS OF *PUNICA GRANATUM* (MEPG)

FRACTIONATION WITH ETHYL ACETATE (FRACTION 1 TO 12)

FRACTION-7

SPECTRAL ANALYSIS

HPLC, <sup>1</sup>H-NMR, <sup>13</sup>C-NMR, IR & MASS

IDENTIFIED AS

VALONEIC ACID DILACTONE (VAD)

Bio evaluation

MEPG AND VAD

IN VITRO ASSAYS

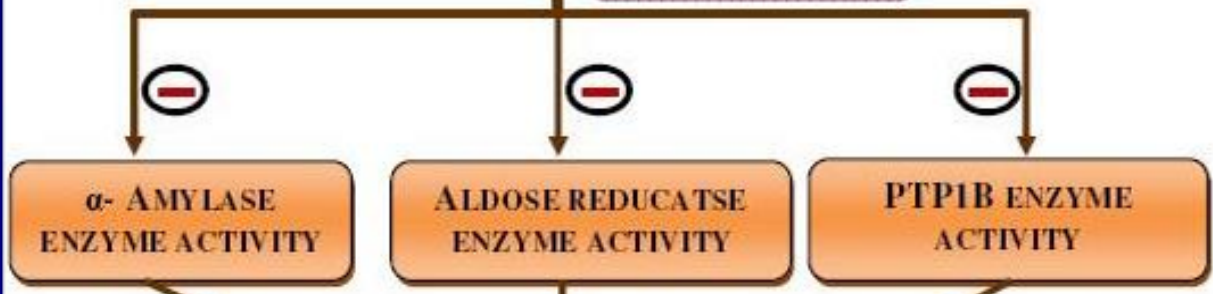

MEPG (200 & 400 MG/KG) AND VAD (10, 25 & 50 MG/KG)

IN VIVO EVALUATION ALLOXAN-INDUCED DIABETES IN RATS

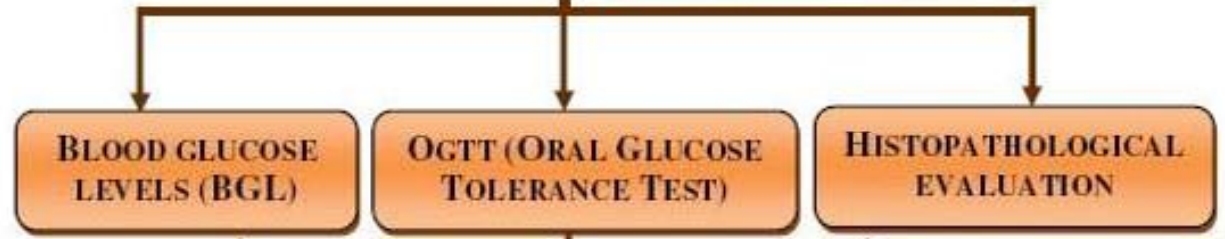

Maintained BGL within the range

Enhanced Glucose

Inhibited Alloxan-Induced Pancreatic Damage and Mortality

IN VIVO ANTI-DIABETIC ACTIVITY
